# Supplementary material
Source: Royal Society of Chemistry journal article supplement (doi:10.1039/d6ce00178e)
Supplement: d6ce00178e1.pdf [file d6ce00178e1.pdf]

### Supplementary material

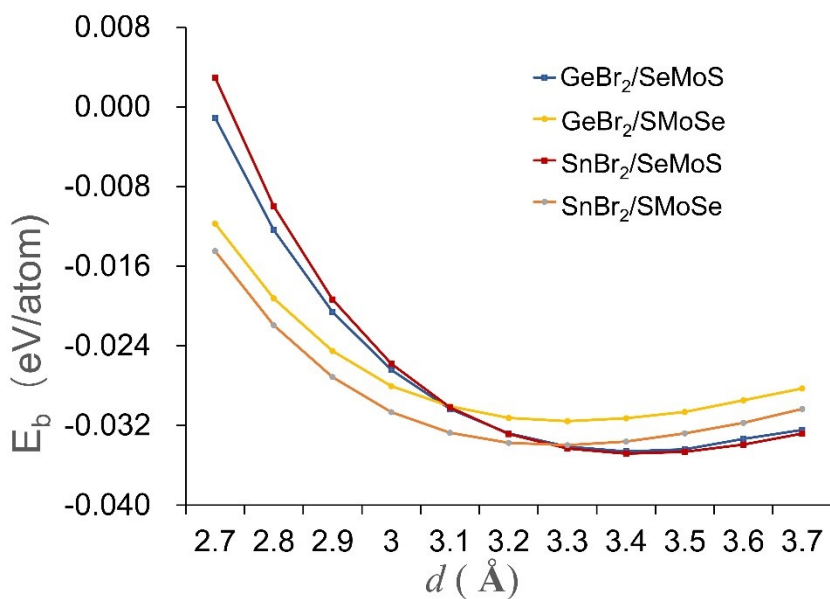

**Fig. S1.** Binding energy ( $E_b$ ) as a function of interlayer distance  $d$  for CsXBr<sub>3</sub> /Janus MoSSe heterostructures.

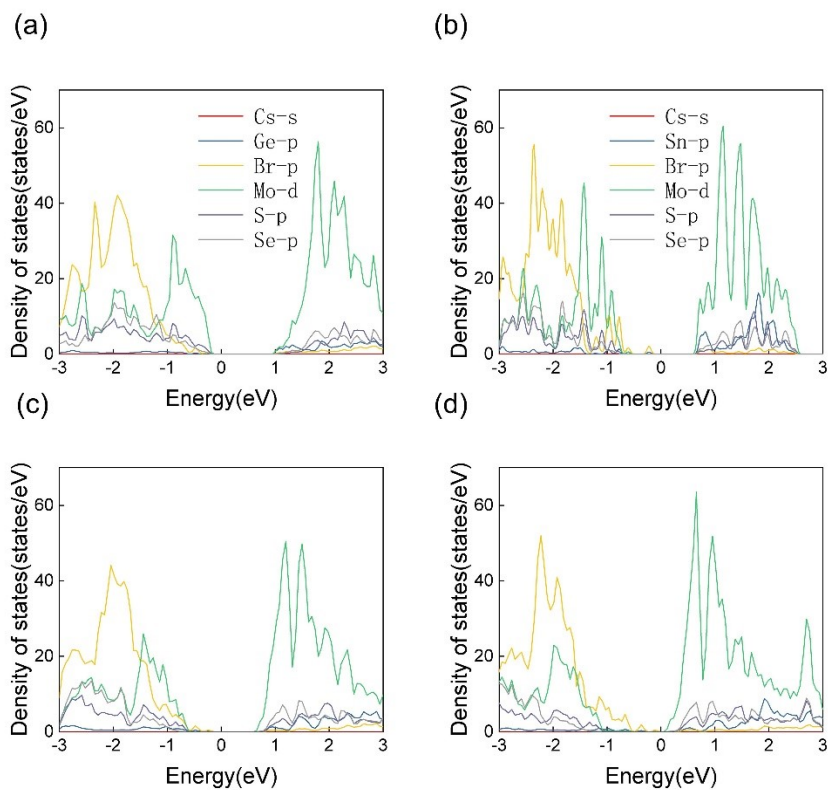

**Fig. S2.** Projected density of states (PDOS) of (a) GeBr<sub>2</sub>/SeMoS, (b) SnBr<sub>2</sub>/SeMoS, (c) GeBr<sub>2</sub>/SMoSe, and (d) SnBr<sub>2</sub>/SMoSe heterostructures.

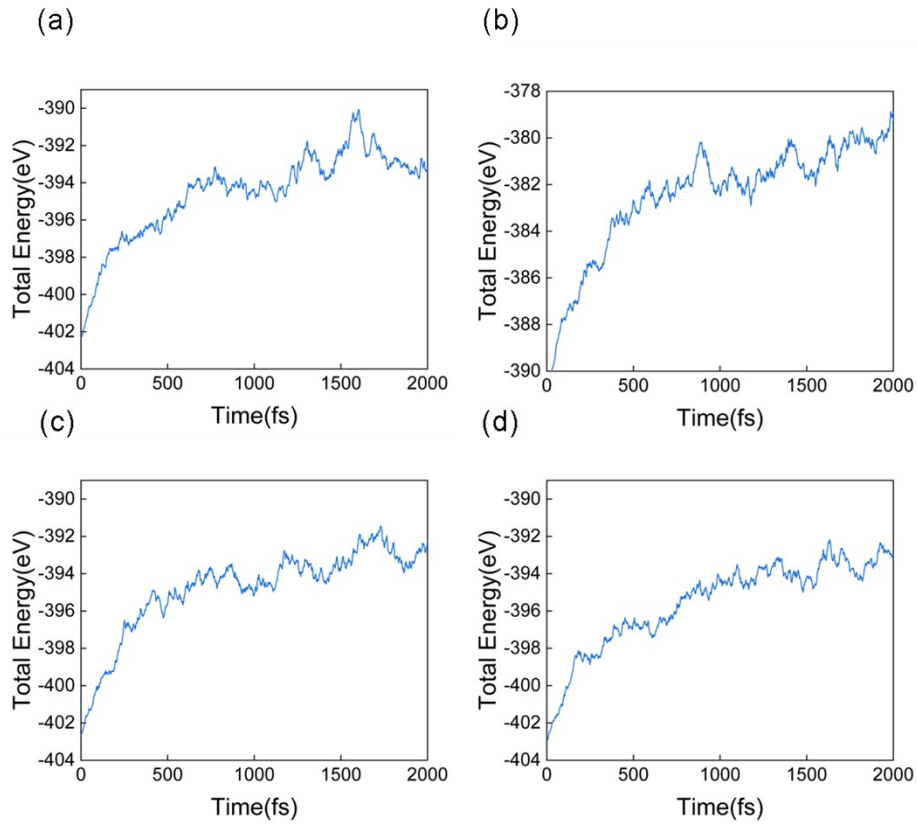

**Fig. S3.** Ab initio molecular dynamics (AIMD) of (a)  $\text{GeBr}_2/\text{SeMoS}$ , (b)  $\text{SnBr}_2/\text{SeMoS}$ , (c)  $\text{GeBr}_2/\text{SMoSe}$ , and (d)  $\text{SnBr}_2/\text{SMoSe}$  heterostructures.

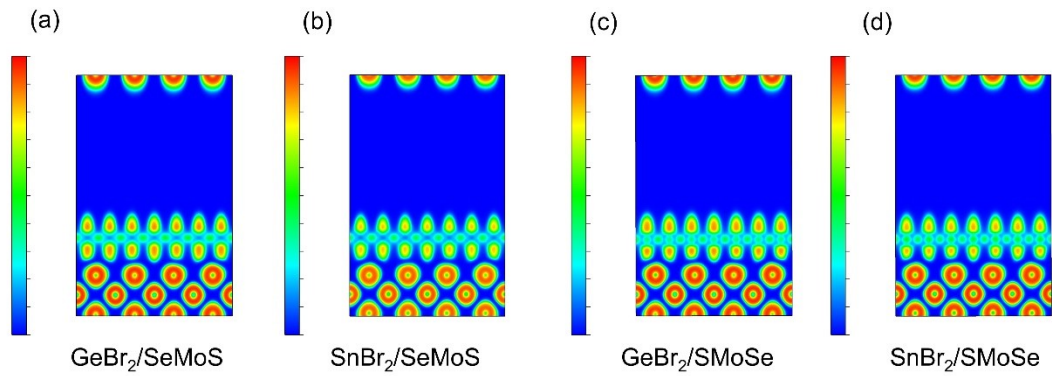

**Fig.S4.** The electron localization function (ELF) of (a)  $\text{GeBr}_2/\text{SeMoS}$ , (b)  $\text{SnBr}_2/\text{SeMoS}$ , (c)  $\text{GeBr}_2/\text{SMoSe}$ , and (d)  $\text{SnBr}_2/\text{SMoSe}$  heterostructures.
